# Supplementary material for: Euryops pectinatus L. Flower Extract Inhibits P-glycoprotein and Reverses Multi-Drug Resistance in Cancer Cells: A Mechanistic Study
Source: PubMed Central journal article supplement (PMC7038149; doi:10.3390/molecules25030647), 2020-02-03
Supplement: molecules-25-00647-s001.pdf [file molecules-25-00647-s001.pdf]

## Supplementary Material

### *Euryops pectinatus* L. flower extract inhibits P-glycoprotein and reverses multi-drug resistance in cancer cells: A mechanistic study

Wafaa M. Elkady<sup>1</sup>, Iriny M. Ayoub<sup>2,\*</sup>, Youstra Abdel-Mottaleb<sup>3</sup>, Mohamed F. ElShafie<sup>4,5</sup> and Michael Wink<sup>6,\*</sup>

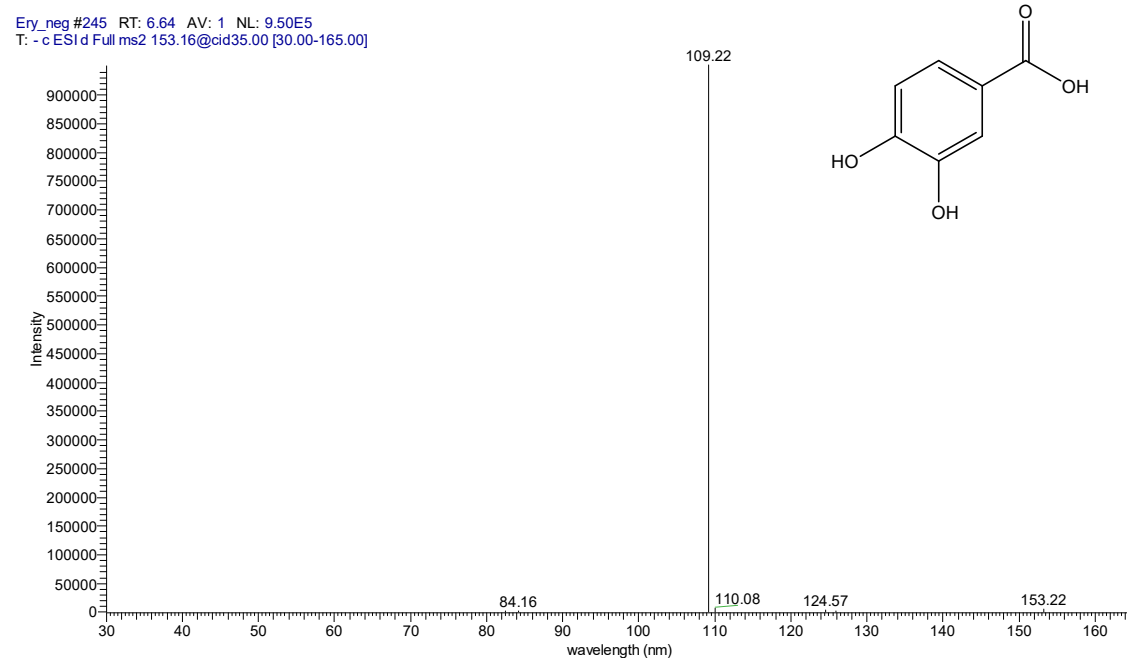

Figure S1. ESI-MS/MS spectrum of protocatechuic acid (**3**) [M-H]<sup>-</sup> at  $m/z$  153

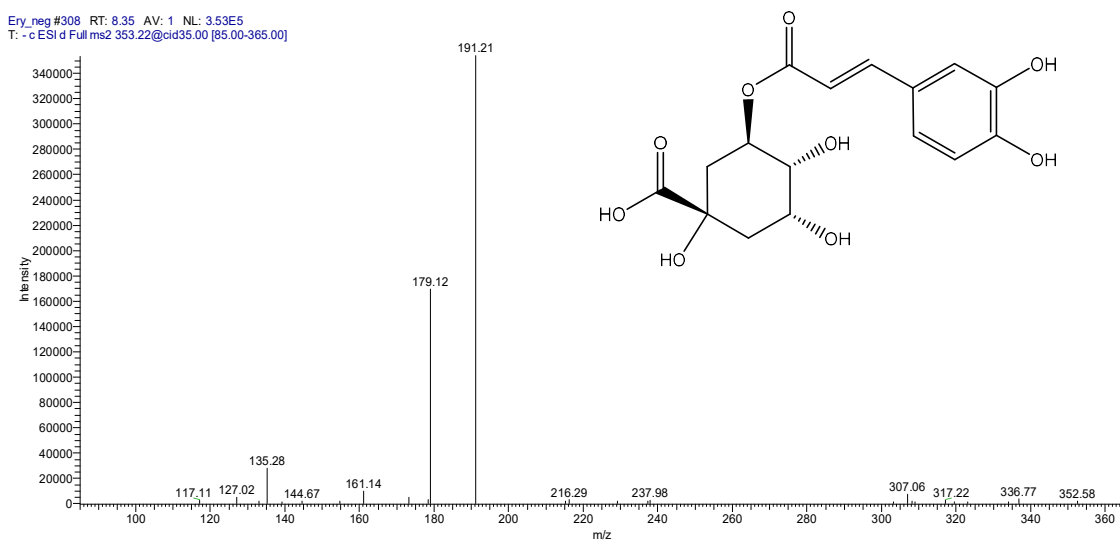

Figure S2. ESI-MS/MS spectrum of chlorogenic acid (**4**) [M-H]<sup>-</sup> at  $m/z$  353

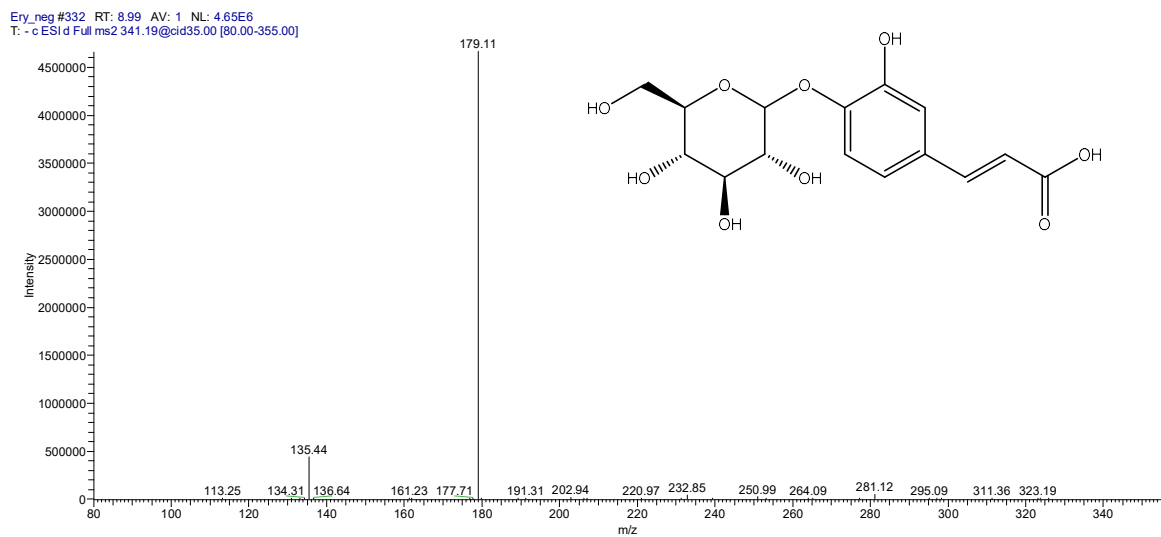

Figure S3. ESI-MS/MS spectrum of caffeic acid-*O*-hexoside (**5**) [M-H]<sup>-</sup> at *m/z* 341.19

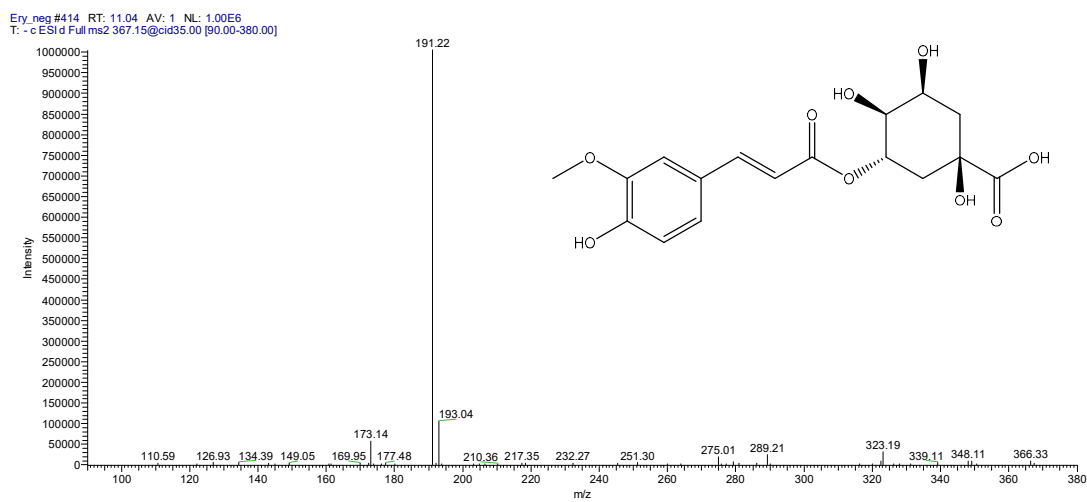

Figure S4. ESI-MS/MS spectrum of feruloyl quinic acid (**10**) [M-H]<sup>-</sup> at *m/z* 367.15

Ery\_neg #420 RT: 11.18 AV: 1 NL: 7.27E6  
T: -c ESI d Full ms2 179.10@cid35.00 [35.00-190.00]

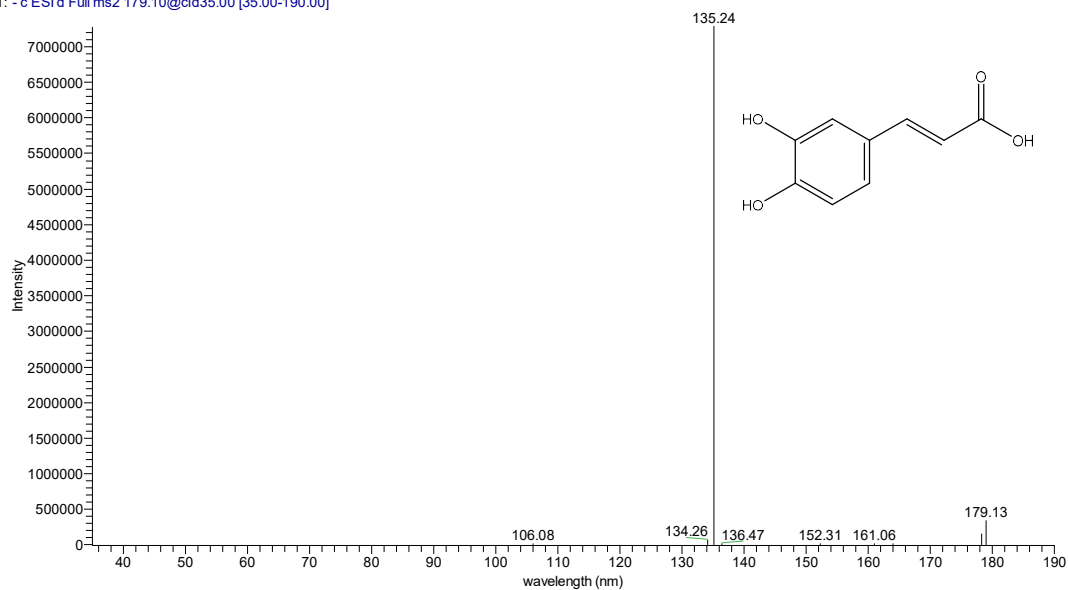

Figure S5. ESI-MS/MS spectrum of caffeic acid (**11**) [M-H]<sup>-</sup> at *m/z* 179

Ery\_neg #438 RT: 11.59 AV: 1 NL: 4.67E6  
T: -c ESI d Full ms2 223.11@cid35.00 [50.00-235.00]

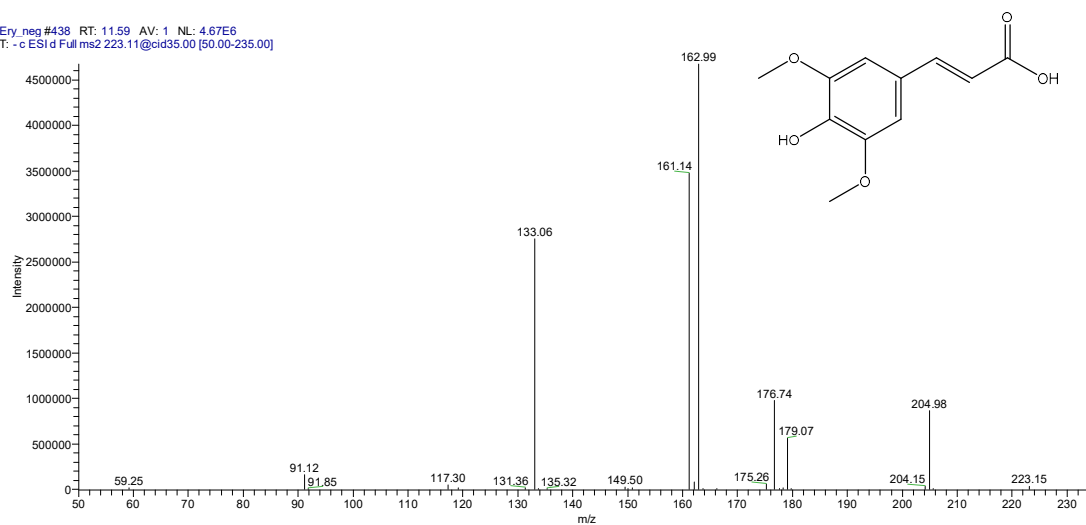

Figure S6. ESI-MS/MS spectrum of sinapic acid (**13**) [M-H]<sup>-</sup> at *m/z* 223

Ery\_neg #576 RT: 14.84 AV: 1 NL: 2.85E4  
T: -c ESI'd Full ms2 593.06@cid35.00 [150.00-605.00]

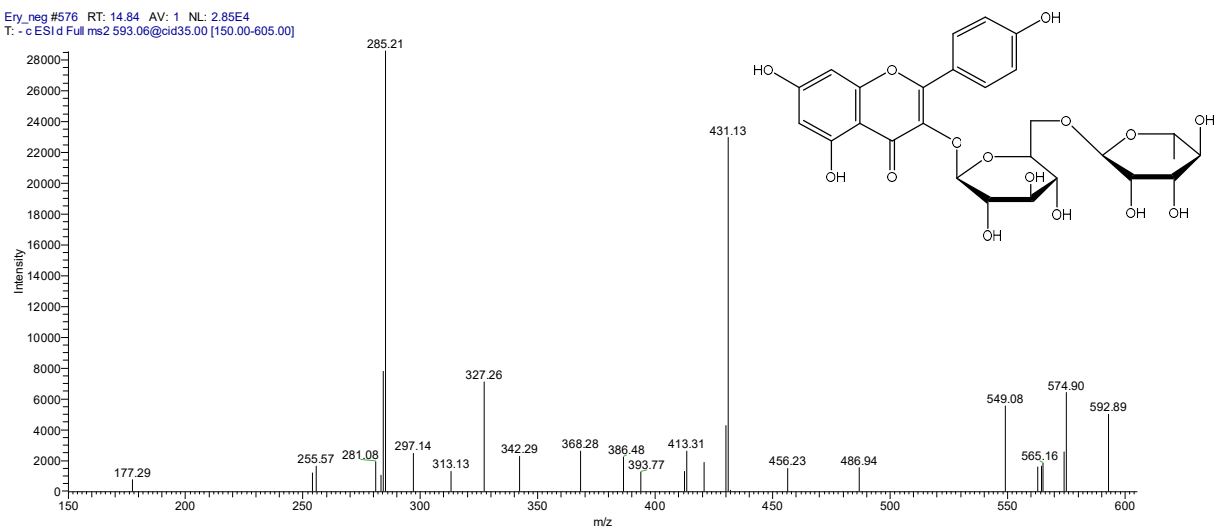

Figure S7. ESI-MS/MS spectrum of kaempferol-3-*O*-rutinoside (**18**) [M-H]<sup>-</sup> at *m/z* 593

Ery\_neg #564 RT: 14.56 AV: 1 NL: 3.62E6  
T: -c ESI'd Full ms2 515.14@cid35.00 [130.00-530.00]

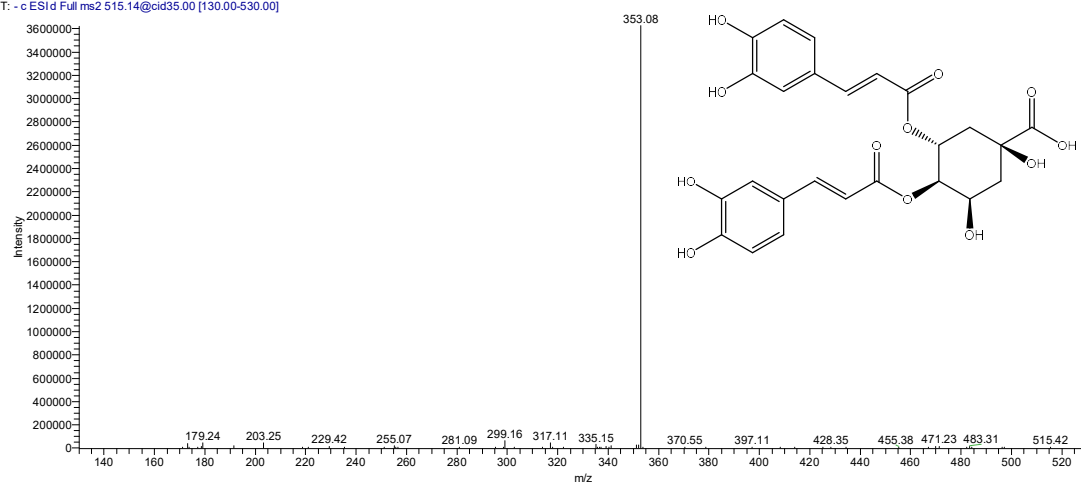

Figure S8. ESI-MS/MS spectrum of dicaffeoyl quinic acid (**19**) [M-H]<sup>-</sup> at *m/z* 515

Ery\_neg #592 RT: 15.23 AV: 1 NL: 7.09E6  
T: -c ESI d Full ms2 609.33@cid35.00 [155.00-620.00]

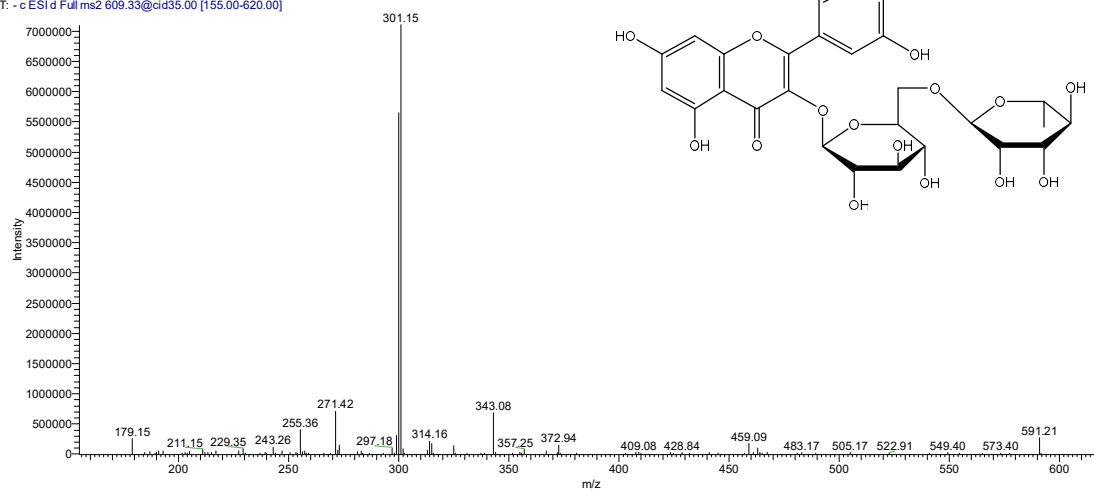

Figure S9. ESI-MS/MS spectrum of quercetin-3-*O*-rutinoside (**20**) [M-H]<sup>-</sup> at *m/z* 609

Ery\_neg #602 RT: 15.43 AV: 1 NL: 8.93E6  
T: -c ESI d Full ms2 463.22@cid35.00 [115.00-475.00]

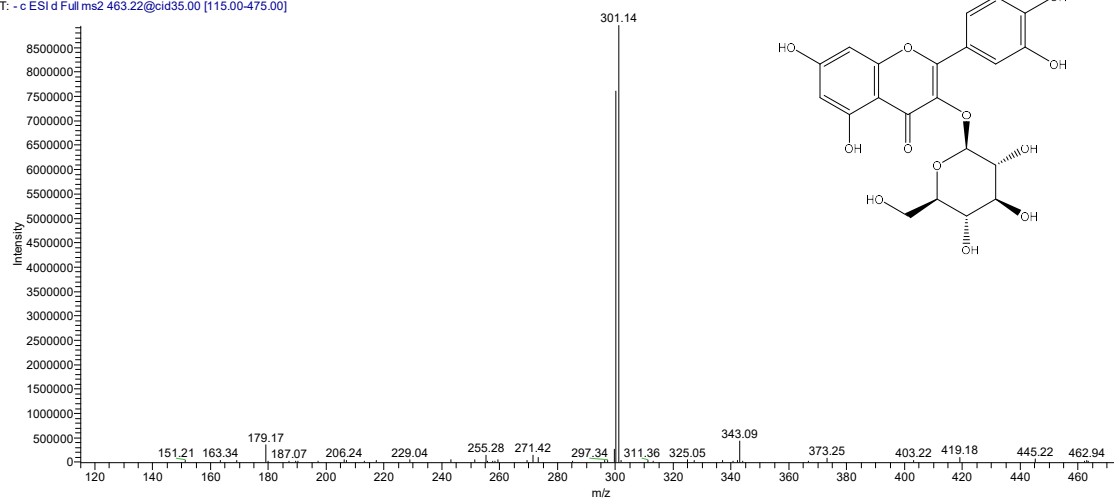

Figure S10. ESI-MS/MS spectrum of quercetin-3-*O*-hexoside (**21**) [M-H]<sup>-</sup> at *m/z* 463

Ery\_neg #648 RT: 16.52 AV: 1 NL: 9.69E6  
T: -c ESI'd Full ms2 623.39@cid35.00 [160.00-635.00]

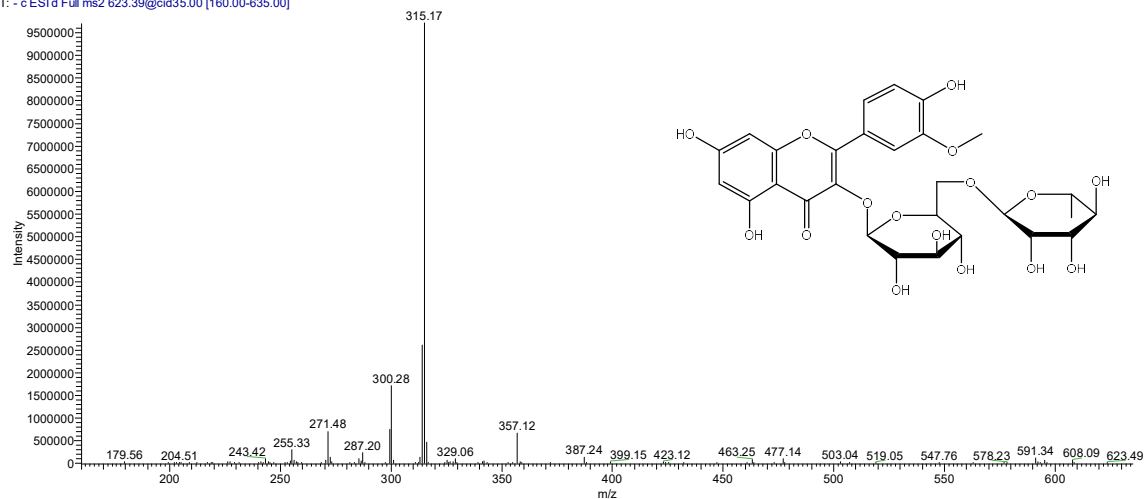

Figure S11. ESI-MS/MS spectrum of isorhamnetin-*O*-rutinoside (**22**) [M-H]<sup>-</sup> at m/z 623

Ery\_neg #676 RT: 17.20 AV: 1 NL: 7.91E6  
T: -c ESI'd Full ms2 477.24@cid35.00 [120.00-490.00]

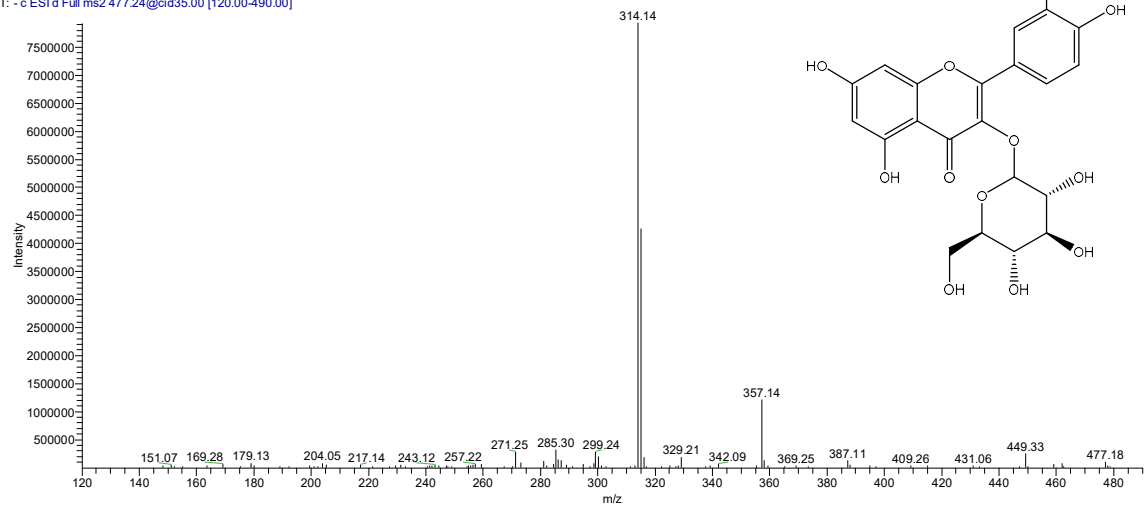

Figure S12. ESI-MS/MS spectrum of isorhamnetin-*O*-hexoside (**23**) [M-H]<sup>-</sup> at m/z 477
